# Supplementary material for: Efficacy of intravitreal AFlibercept injection For Improvement of retinal Nonperfusion In diabeTic retinopathY (AFFINITY study)
Source: PubMed Central journal article supplement — BMJ Open Diabetes Res Care. 2020 Oct 19;8(1):e001616. doi: 10.1136/bmjdrc-2020-001616 (PMC7574886; doi:10.1136/bmjdrc-2020-001616), 2020-10-19

**eFigure 1.** Topographical analysis of nonperfusion areas. Three concentric circles (i.e., zone 1, zone 2, and zone 3) and four quadrants (i.e., superior (S), inferior (I), temporal (T), and nasal (N)) centered at the optic disc.

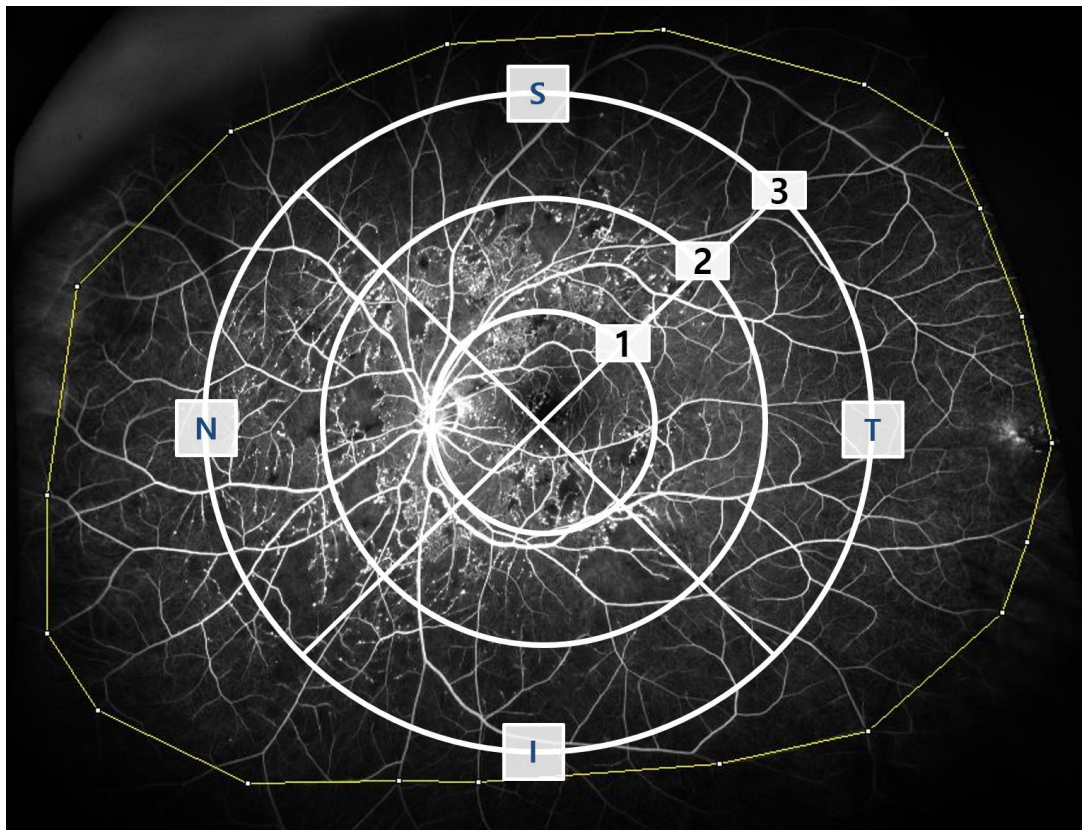

Supplement: bmjdrc-2020-001616supp001.pdf [file bmjdrc-2020-001616supp001.pdf]
