# Supplementary material for: Efficacy of intravitreal AFlibercept injection For Improvement of retinal Nonperfusion In diabeTic retinopathY (AFFINITY study)
Source: PubMed Central journal article supplement — BMJ Open Diabetes Res Care. 2020 Oct 19;8(1):e001616. doi: 10.1136/bmjdrc-2020-001616 (PMC7574886; doi:10.1136/bmjdrc-2020-001616), 2020-10-19

**eFigure 2.** Measurement of vascular leakage index. (A) Setting of the region of interest (ROI) near the retinal vascular main trunk vessels. (B) Adjusting the thresholds to properly include the main vessels and selecting the NaN background to measure the average of signal intensities of segmented main vessels. (C) Normalizing the intensity of the whole image using the average of the main vessel intensity as a reference. (D, E) Designating the ROI and measuring the signal intensities as a value of indicating the degree of vascular leakage. (D) Vascular leakage index in the early phase of fluorescein angiography image: 0.226 (E) Vascular leakage index in the late phase of fluorescein angiography image: 0.383.

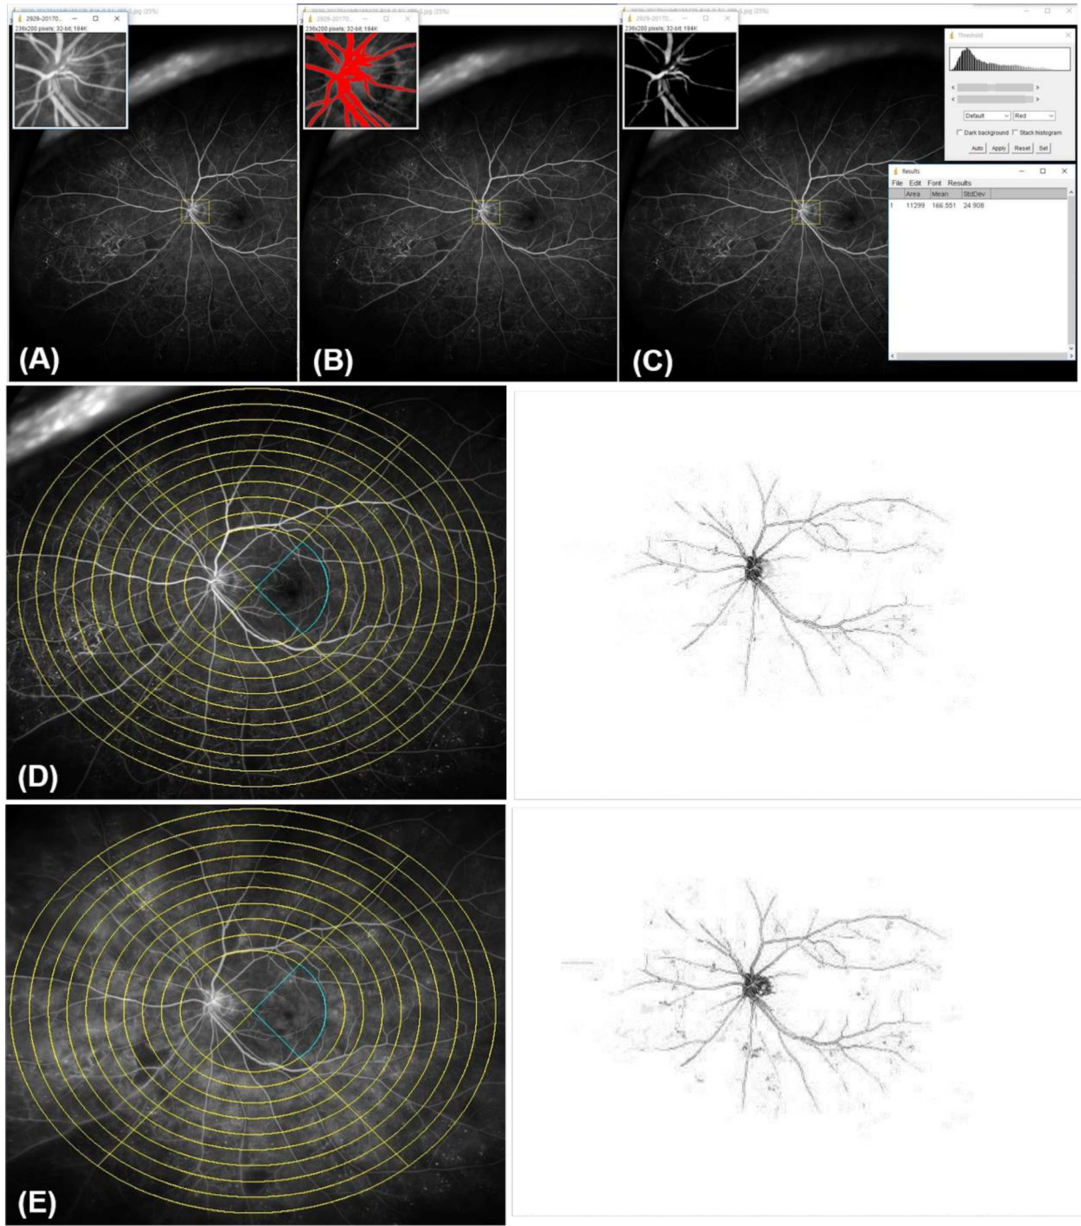

Supplement: bmjdrc-2020-001616supp002.pdf [file bmjdrc-2020-001616supp002.pdf]
