# Supplementary material for: Efficacy of intravitreal AFlibercept injection For Improvement of retinal Nonperfusion In diabeTic retinopathY (AFFINITY study)
Source: PubMed Central journal article supplement — BMJ Open Diabetes Res Care. 2020 Oct 19;8(1):e001616. doi: 10.1136/bmjdrc-2020-001616 (PMC7574886; doi:10.1136/bmjdrc-2020-001616), 2020-10-19

**eFigure 3.** Trial profile. NPI = nonperfusion index; PRP = panretinal photocoagulation; VEGF = vascular endothelial growth factor.

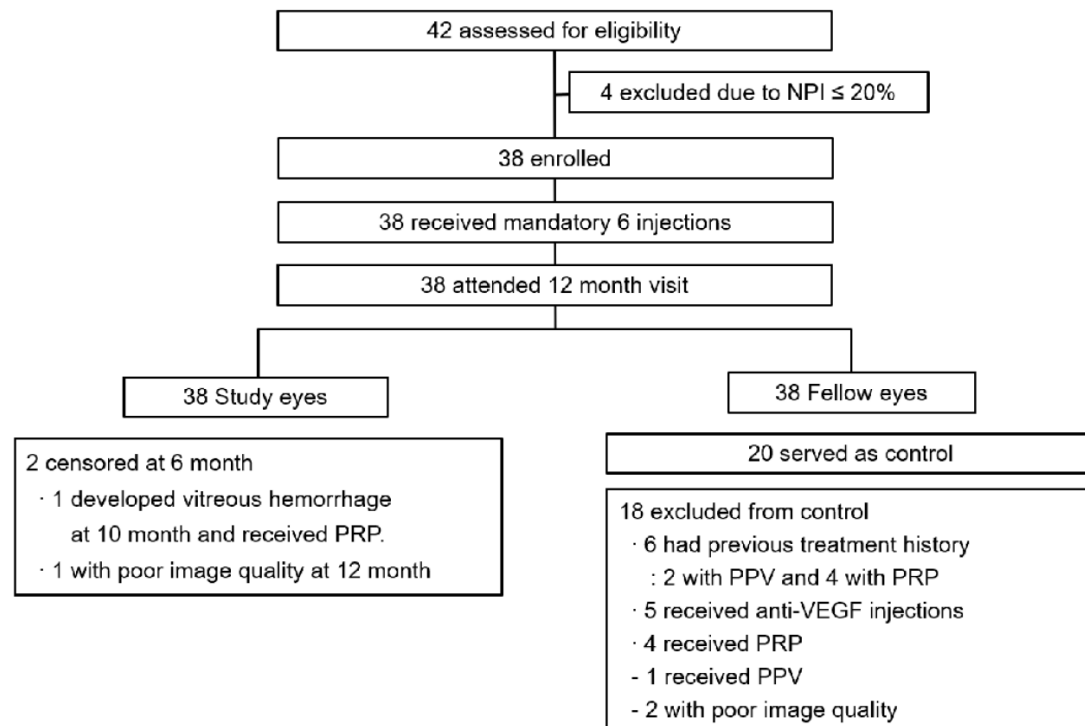

Supplement: bmjdrc-2020-001616supp003.pdf [file bmjdrc-2020-001616supp003.pdf]
