# Supplementary material for: Efficacy of intravitreal AFlibercept injection For Improvement of retinal Nonperfusion In diabeTic retinopathY (AFFINITY study)
Source: PubMed Central journal article supplement — BMJ Open Diabetes Res Care. 2020 Oct 19;8(1):e001616. doi: 10.1136/bmjdrc-2020-001616 (PMC7574886; doi:10.1136/bmjdrc-2020-001616), 2020-10-19
Supplement: bmjdrc-2020-001616supp004.pdf [file bmjdrc-2020-001616supp004.pdf]

eTable 1. Changes in nonperfusion areas (NPAs) after intravitreal aflibercept injections according to the topographic distributions

|          | Baseline  | 6 months  | 12 months | <i>P value</i> * | <i>P value</i> <sup>#</sup> | <i>P value</i> <sup>+</sup> |
|----------|-----------|-----------|-----------|------------------|-----------------------------|-----------------------------|
| Total    | 0.46±0.10 | 0.43±0.08 | 0.44±0.09 | 0.015            | 0.220                       | 0.123                       |
| Temporal | 0.11±0.07 | 0.10±0.06 | 0.10±0.07 | 0.245            | 0.269                       | 0.603                       |
| Superior | 0.33±0.12 | 0.30±0.11 | 0.31±0.11 | 0.015            | 0.225                       | 0.216                       |
| Nasal    | 0.11±0.08 | 0.10±0.08 | 0.12±0.09 | 0.135            | 0.110                       | 0.355                       |
| Inferior | 0.43±0.13 | 0.40±0.11 | 0.42±0.11 | 0.005            | 0.125                       | 0.459                       |
| Zone 1   | 0.01±0.03 | 0.01±0.01 | 0.01±0.02 | 0.485            | 0.512                       | 0.726                       |
| Zone 2   | 0.06±0.05 | 0.06±0.04 | 0.08±0.06 | 0.250            | 0.077                       | 0.175                       |
| Zone 3   | 0.39±0.10 | 0.33±0.09 | 0.37±0.10 | 0.005            | 0.045                       | 0.316                       |

*P value*\*: Baseline vs. 6 months, *P value*<sup>#</sup>: 6 months vs. 12 months, *P value*<sup>+</sup>: Baseline vs. 12 months.
