# Supplementary material for: Efficacy of intravitreal AFlibercept injection For Improvement of retinal Nonperfusion In diabeTic retinopathY (AFFINITY study)
Source: PubMed Central journal article supplement — BMJ Open Diabetes Res Care. 2020 Oct 19;8(1):e001616. doi: 10.1136/bmjdrc-2020-001616 (PMC7574886; doi:10.1136/bmjdrc-2020-001616), 2020-10-19

**eFigure 4.** Representative ultrawide field fluorescein angiographic images from a patient with significant improvement in vascular leakage after aflibercept therapy. The study eyes (A; baseline, B; 6-months, C; 12-months) showed significant improvements in vascular leakage after six aflibercept injections compared with untreated fellow eyes (D; baseline, E; 6-months, F; 12-months). (A) Vascular leakage at baseline: 0.324 (B) Vascular leakage at 6-months: 0.163 (C) Vascular leakage at 12-months: 0.265, (D) Vascular leakage at baseline: 0.204 (E) Vascular leakage at 6-months: 0.198 (F) Vascular leakage at 12-months: 0.187.

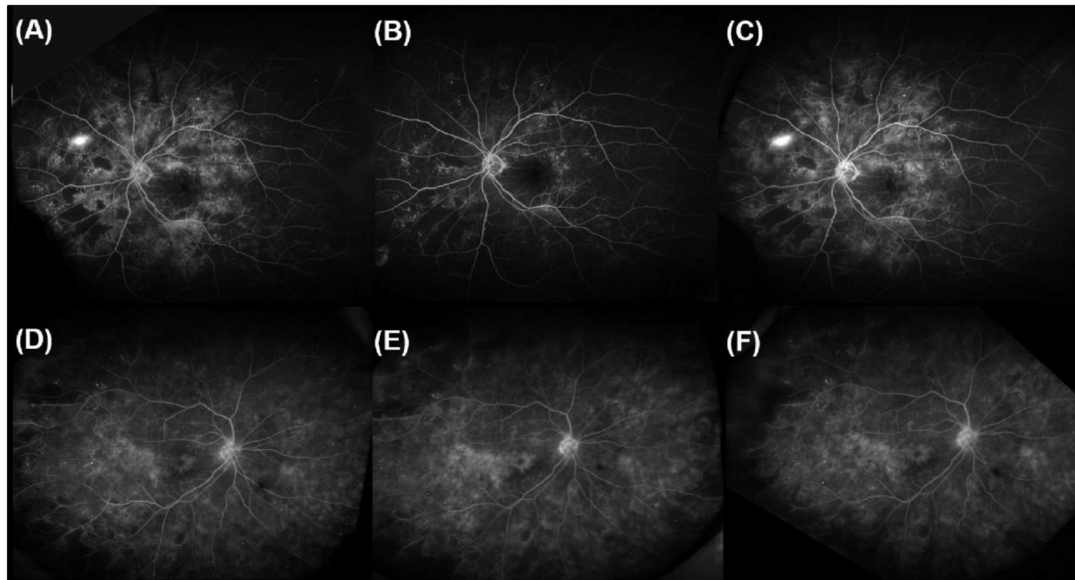

Supplement: bmjdrc-2020-001616supp005.pdf [file bmjdrc-2020-001616supp005.pdf]
