# Supplementary material for: Efficacy of intravitreal AFlibercept injection For Improvement of retinal Nonperfusion In diabeTic retinopathY (AFFINITY study)
Source: PubMed Central journal article supplement — BMJ Open Diabetes Res Care. 2020 Oct 19;8(1):e001616. doi: 10.1136/bmjdrc-2020-001616 (PMC7574886; doi:10.1136/bmjdrc-2020-001616), 2020-10-19

**eFigure 5.** Proportions of patients according to the Diabetic Retinopathy Severity Scale (DRSS) score at baseline and 6 months and 12 months after six consecutive aflibercept treatment.

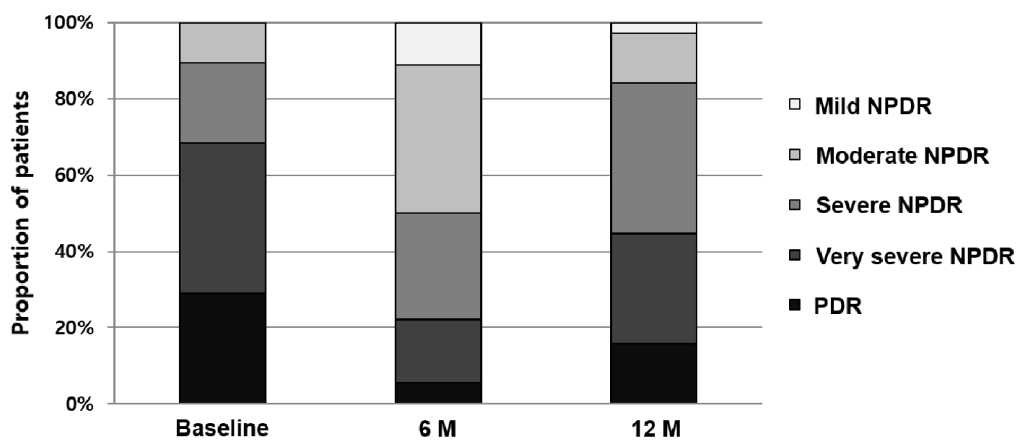

Supplement: bmjdrc-2020-001616supp006.pdf [file bmjdrc-2020-001616supp006.pdf]
